# Supplementary figures and images for: STAT3 is a master regulator of epithelial identity and KRAS-driven tumorigenesis
Source: PubMed Central journal article supplement — Genes Dev. 2018 Sep 1;32(17-18):1175–87. doi: 10.1101/gad.311852.118 (PMC6120712; doi:10.1101/gad.311852.118), 2018-09-01

A

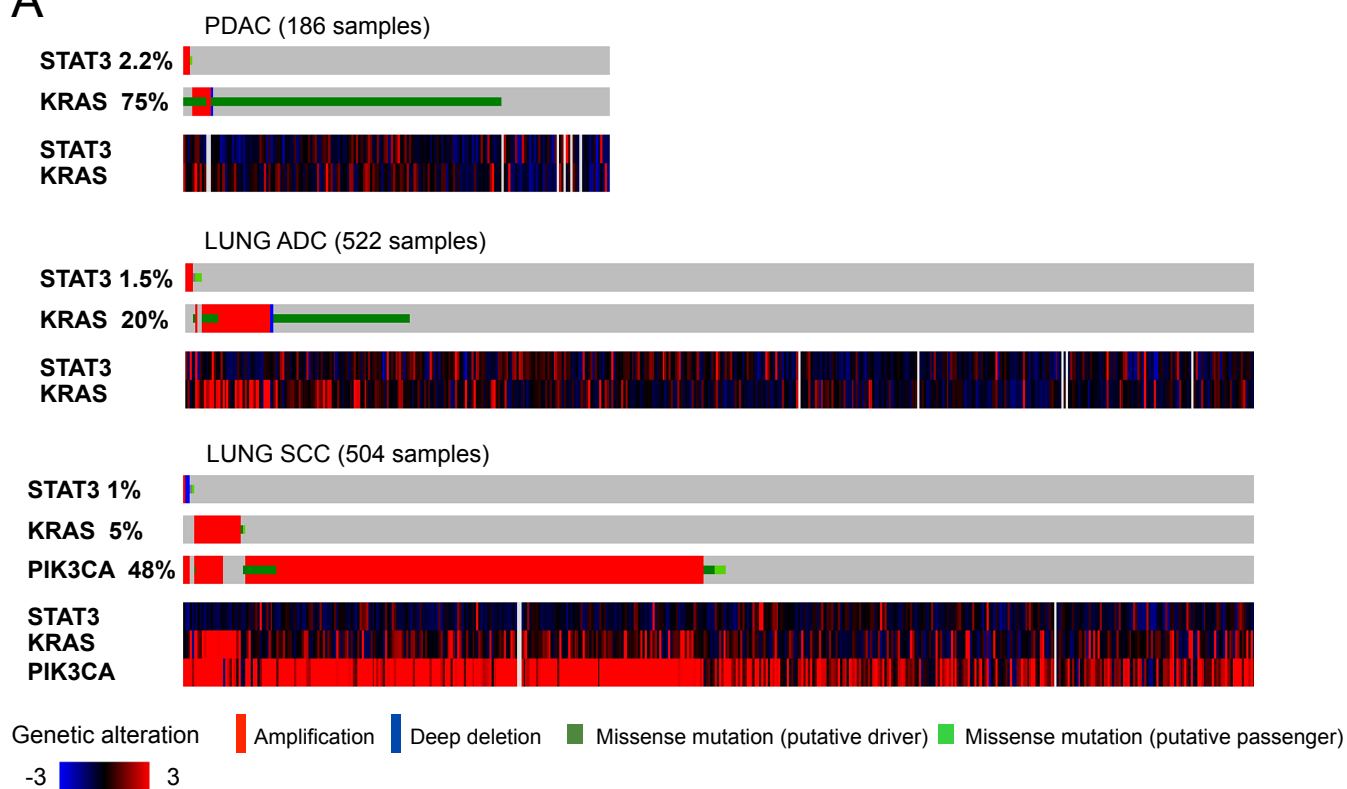

B

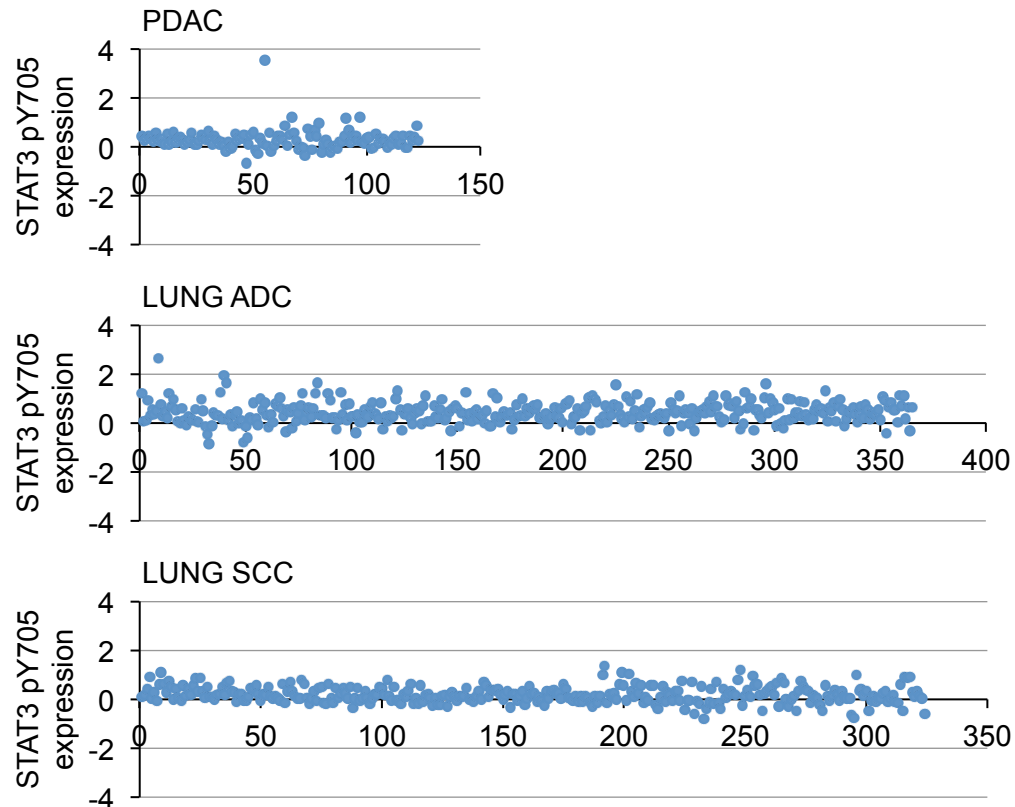

Supplement: supp_gad.311852.118_Supplemental_Figure1AB.pptx.pdf [file supp_gad.311852.118_Supplemental_Figure1AB.pptx.pdf]

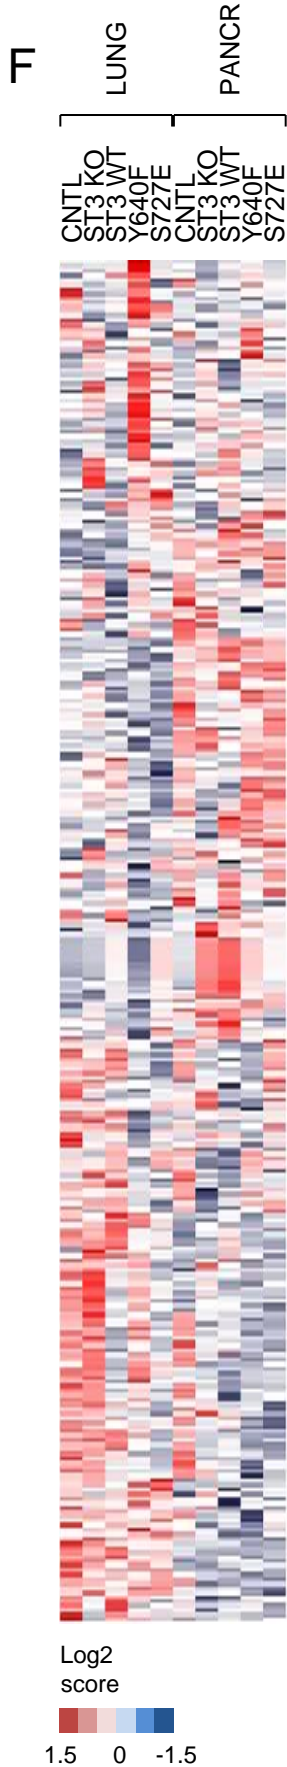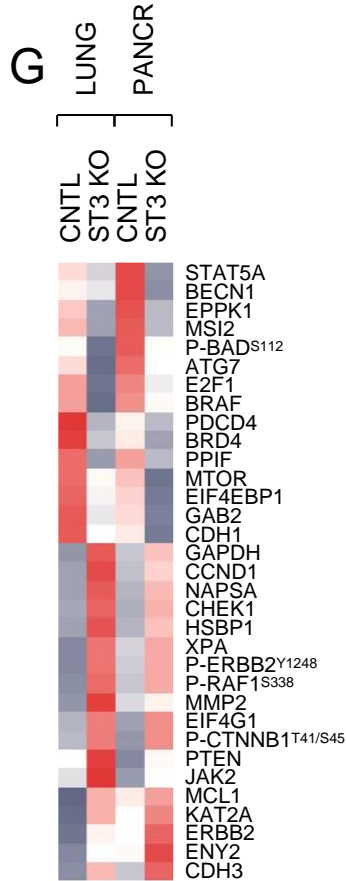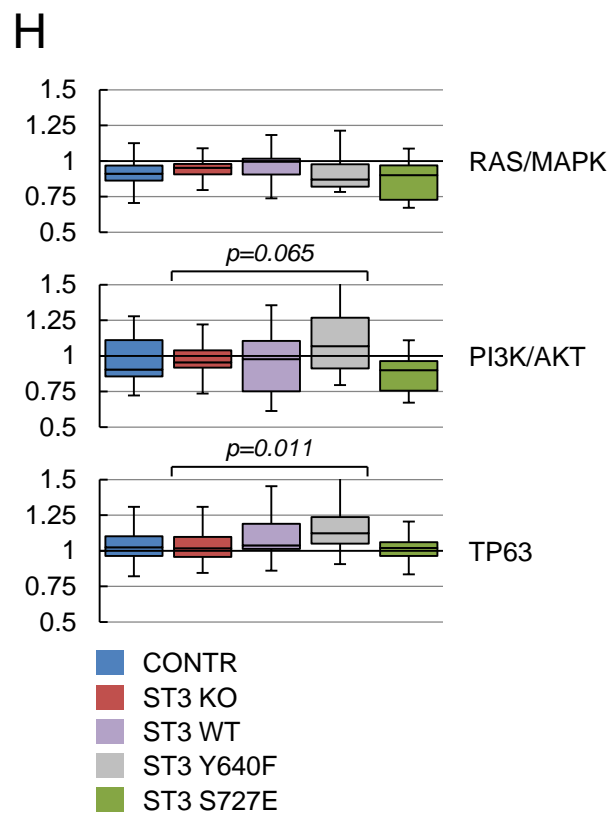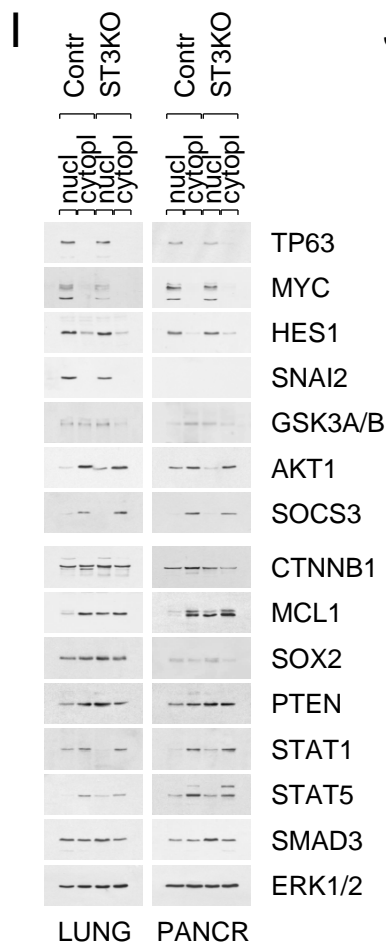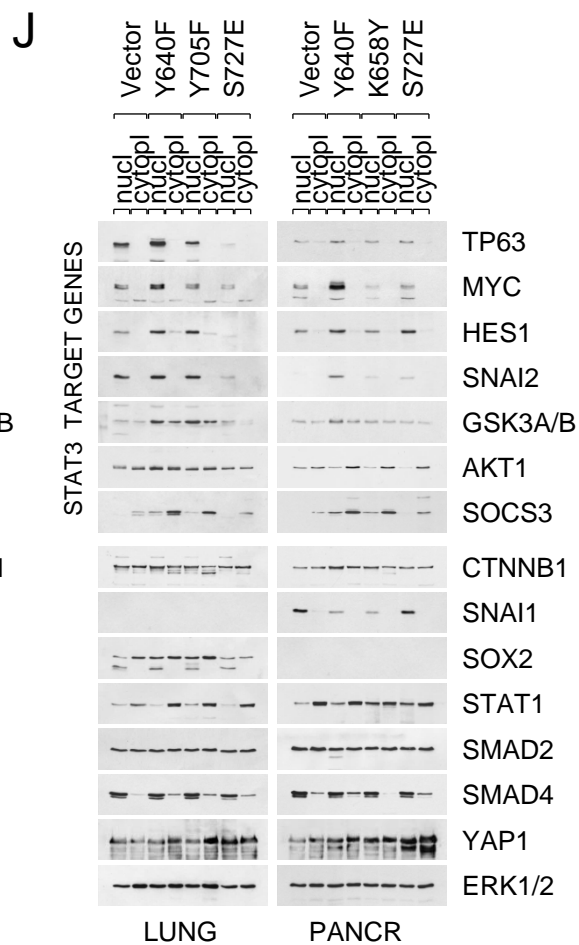

Supplement: supp_gad.311852.118_Supplemental_Figure6FJ.pdf [file supp_gad.311852.118_Supplemental_Figure6FJ.pdf]
